# Supplementary material for: RNF13 Dileucine Motif Variants L311S and L312P Interfere with Endosomal Localization and AP-3 Complex Association
Source: MDPI journal article supplement (doi:10.3390/cells10113063), 2021-11-06
Supplement: s1 [file s1]

## **SUPPLEMENTARY TABLES S1-10**

### **RNF13 dileucine motif variants L311S and L312P interfere with endosomal localization and AP-3 complex association**

Valérie C. Cabana, Antoine Y. Bouchard, Audrey M. Sénécal, Kim Ghilarducci, Saïd Kourrich,  
Laurent Cappadocia, Marc P. Lussier

**Table S1. Statistical values - Manders overlap coefficient, Figure 1A-E**

| Marker                     |                                                         | RNF13 WT            | RNF13 L311S         | RNF13 L312P         |
|----------------------------|---------------------------------------------------------|---------------------|---------------------|---------------------|
| <b>EEA1</b><br>(panel A)   | Number of cells analyzed<br>(after removal of outliers) | 29                  | 30                  | 30                  |
|                            | Mean $\pm$ SEM                                          | 0.0825 $\pm$ 0.0075 | 0.0849 $\pm$ 0.0076 | 0.0973 $\pm$ 0.0070 |
|                            | Exact p value (WT)                                      |                     | >0.9999             | 0.3167              |
|                            | Exact p value (L311S)                                   | >0.9999             |                     | 0.6795              |
|                            | Exact p value (L312P)                                   | 0.3167              | 0.6795              |                     |
| <b>Lamp 1</b><br>(panel B) | Number of cells analyzed<br>(after removal of outliers) | 29                  | 30                  | 30                  |
|                            | Mean $\pm$ SEM                                          | 0.2778 $\pm$ 0.0152 | 0.1435 $\pm$ 0.0151 | 0.1726 $\pm$ 0.0160 |
|                            | Exact p value (WT)                                      |                     | <0.0001             | 0.0004              |
|                            | Exact p value (L311S)                                   | <0.0001             |                     | 0.6402              |
|                            | Exact p value (L312P)                                   | 0.0004              | 0.6402              |                     |
| <b>Rab5</b><br>(panel C)   | Number of cells analyzed<br>(after removal of outliers) | 30                  | 29                  | 30                  |
|                            | Mean $\pm$ SEM                                          | 0.2141 $\pm$ 0.0186 | 0.2210 $\pm$ 0.0198 | 0.2068 $\pm$ 0.0169 |
|                            | Exact p value (WT)                                      |                     | >0.9999             | >0.9999             |
|                            | Exact p value (L311S)                                   | >0.9999             |                     | >0.9999             |
|                            | Exact p value (L312P)                                   | >0.9999             | >0.9999             |                     |
| <b>Rab7</b><br>(panel D)   | Number of cells analyzed<br>(after removal of outliers) | 30                  | 30                  | 30                  |
|                            | Mean $\pm$ SEM                                          | 0.3669 $\pm$ 0.0188 | 0.3224 $\pm$ 0.0228 | 0.3145 $\pm$ 0.0195 |
|                            | Exact p value (WT)                                      |                     | 0.2209              | 0.2197              |
|                            | Exact p value (L311S)                                   | 0.2209              |                     | >0.9999             |
|                            | Exact p value (L312P)                                   | 0.2197              | >0.9999             |                     |
| <b>Rab9</b><br>(panel E)   | Number of cells analyzed<br>(after removal of outliers) | 30                  | 30                  | 30                  |
|                            | Mean $\pm$ SEM                                          | 0.3606 $\pm$ 0.0275 | 0.3419 $\pm$ 0.0196 | 0.3731 $\pm$ 0.0205 |
|                            | Exact p value (WT)                                      |                     | >0.9999             | >0.9999             |
|                            | Exact p value (L311S)                                   | >0.9999             |                     | 0.9260              |
|                            | Exact p value (L312P)                                   | >0.9999             | 0.9260              |                     |

**Table S2. Statistical values - Vesicle diameter, Figure 1F-J**

| Marker                     |                                                            | NT                     | RNF13<br>WT            | RNF13<br>L311S         | RNF13<br>L312P         |
|----------------------------|------------------------------------------------------------|------------------------|------------------------|------------------------|------------------------|
| <b>EEA1</b><br>(panel F)   | Number of vesicles analyzed<br>(after removal of outliers) | 75                     | 71                     | 75                     | 74                     |
|                            | Mean $\pm$ SEM ( $\mu$ m)                                  | 0.4048 $\pm$<br>0.0089 | 0.3877 $\pm$<br>0.0093 | 0.5119 $\pm$<br>0.0126 | 0.5151 $\pm$<br>0.0100 |
|                            | Exact p value (NT)                                         |                        | >0.9999                | <0.0001                | <0.0001                |
|                            | Exact p value (WT)                                         | >0.9999                |                        | <0.0001                | <0.0001                |
|                            | Exact p value (L311S)                                      | <0.0001                | <0.0001                |                        | >0.9999                |
|                            | Exact p value (L312P)                                      | <0.0001                | <0.0001                | >0.9999                |                        |
| <b>Lamp 1</b><br>(panel G) | Number of vesicles analyzed<br>(after removal of outliers) | 75                     | 75                     | 74                     | 73                     |
|                            | Mean $\pm$ SEM ( $\mu$ m)                                  | 0.6415 $\pm$<br>0.0124 | 0.6365 $\pm$<br>0.0138 | 0.8104 $\pm$<br>0.0238 | 0.7541 $\pm$<br>0.0183 |
|                            | Exact p value (NT)                                         |                        | >0.9999                | <0.0001                | <0.0001                |
|                            | Exact p value (WT)                                         | >0.9999                |                        | <0.0001                | <0.0001                |
|                            | Exact p value (L311S)                                      | <0.0001                | <0.0001                |                        | >0.9999                |
|                            | Exact p value (L312P)                                      | <0.0001                | <0.0001                | >0.9999                |                        |
| <b>Rab5</b><br>(panel H)   | Number of vesicles analyzed<br>(after removal of outliers) | 75                     | 75                     | 75                     | 75                     |
|                            | Mean $\pm$ SEM ( $\mu$ m)                                  | 0.5175 $\pm$<br>0.0106 | 0.5161 $\pm$<br>0.0083 | 0.6325 $\pm$<br>0.0088 | 0.6520 $\pm$<br>0.0089 |
|                            | Exact p value (NT)                                         |                        | >0.9999                | <0.0001                | <0.0001                |
|                            | Exact p value (WT)                                         | >0.9999                |                        | <0.0001                | <0.0001                |
|                            | Exact p value (L311S)                                      | <0.0001                | <0.0001                |                        | >0.9999                |
|                            | Exact p value (L312P)                                      | <0.0001                | <0.0001                | >0.9999                |                        |
| <b>Rab7</b><br>(panel I)   | Number of vesicles analyzed<br>(after removal of outliers) | 75                     | 75                     | 75                     | 75                     |
|                            | Mean $\pm$ SEM ( $\mu$ m)                                  | 0.7512 $\pm$<br>0.0128 | 0.7679 $\pm$<br>0.0122 | 1.061 $\pm$<br>0.0170  | 1.012 $\pm$<br>0.0144  |
|                            | Exact p value (NT)                                         |                        | >0.9999                | <0.0001                | <0.0001                |
|                            | Exact p value (WT)                                         | >0.9999                |                        | <0.0001                | <0.0001                |
|                            | Exact p value (L311S)                                      | <0.0001                | <0.0001                |                        | >0.9999                |
|                            | Exact p value (L312P)                                      | <0.0001                | <0.0001                | >0.9999                |                        |
| <b>Rab9</b><br>(panel J)   | Number of vesicles analyzed<br>(after removal of outliers) | 75                     | 75                     | 75                     | 75                     |
|                            | Mean $\pm$ SEM ( $\mu$ m)                                  | 0.7947 $\pm$<br>0.0115 | 0.8017 $\pm$<br>0.0108 | 0.6149 $\pm$<br>0.0090 | 0.6089 $\pm$<br>0.0101 |
|                            | Exact p value (NT)                                         |                        | >0.9999                | <0.0001                | <0.0001                |
|                            | Exact p value (WT)                                         | >0.9999                |                        | <0.0001                | <0.0001                |
|                            | Exact p value (L311S)                                      | <0.0001                | <0.0001                |                        | >0.9999                |
|                            | Exact p value (L312P)                                      | <0.0001                | <0.0001                | >0.9999                |                        |

**Table S3. Statistical values - Number of punctae (EGF), Figure 2B**

| Time           |                                                         | NT           | RNF13<br>WT  | RNF13<br>L311S | RNF13<br>L312P |
|----------------|---------------------------------------------------------|--------------|--------------|----------------|----------------|
| <b>0 min</b>   | Number of cells analyzed<br>(after removal of outliers) | 44           | 41           | 45             | 43             |
|                | Mean $\pm$ SEM                                          | 264 $\pm$ 19 | 221 $\pm$ 20 | 220 $\pm$ 41   | 228 $\pm$ 38   |
|                | Exact p value (NT)                                      |              | 0.3787       | 0.3478         | 0.9996         |
|                | Exact p value (WT)                                      | 0.3787       |              | >0.9999        | 0.4402         |
|                | Exact p value (L311S)                                   | 0.3478       | >0.9999      |                | 0.4071         |
|                | Exact p value (L312P)                                   | 0.9996       | 0.4402       | 0.4071         |                |
| <b>15 mins</b> | Number of cells analyzed<br>(after removal of outliers) | 44           | 46           | 48             | 43             |
|                | Mean $\pm$ SEM                                          | 157 $\pm$ 14 | 154 $\pm$ 10 | 152 $\pm$ 14   | 156 $\pm$ 16   |
|                | Exact p value (NT)                                      |              | 0.9994       | 0.9978         | >0.9999        |
|                | Exact p value (WT)                                      | 0.9994       |              | >0.9999        | 0.9998         |
|                | Exact p value (L311S)                                   | 0.9978       | >0.9999      |                | 0.9988         |
|                | Exact p value (L312P)                                   | >0.9999      | 0.9998       | 0.9988         |                |
| <b>30 mins</b> | Number of cells analyzed<br>(after removal of outliers) | 46           | 46           | 45             | 42             |
|                | Mean $\pm$ SEM                                          | 108 $\pm$ 7  | 115 $\pm$ 9  | 98 $\pm$ 7     | 103 $\pm$ 8    |
|                | Exact p value (NT)                                      |              | 0.9939       | 0.9788         | 0.9976         |
|                | Exact p value (WT)                                      | 0.9939       |              | 0.9138         | 0.9701         |
|                | Exact p value (L311S)                                   | 0.9788       | 0.9138       |                | 0.9968         |
|                | Exact p value (L312P)                                   | 0.9976       | 0.9701       | 0.9968         |                |
| <b>60 mins</b> | Number of cells analyzed<br>(after removal of outliers) | 46           | 47           | 50             | 45             |
|                | Mean $\pm$ SEM                                          | 55 $\pm$ 5   | 76 $\pm$ 9   | 84 $\pm$ 7     | 83 $\pm$ 6     |
|                | Exact p value (NT)                                      |              | 0.8489       | 0.6785         | 0.7015         |
|                | Exact p value (WT)                                      | 0.8489       |              | 0.9898         | 0.9930         |
|                | Exact p value (L311S)                                   | 0.6785       | 0.9898       |                | >0.9999        |
|                | Exact p value (L312P)                                   | 0.7015       | 0.9930       | >0.9999        |                |

**Table S4. Statistical values - Pearson's coefficient (EGF), Figure 2C**

| Time           |                                                         | NT                   | RNF13<br>WT          | RNF13<br>L311S       | RNF13<br>L312P       |
|----------------|---------------------------------------------------------|----------------------|----------------------|----------------------|----------------------|
| <b>0 min</b>   | Number of cells analyzed<br>(after removal of outliers) | 45                   | 40                   | 38                   | 42                   |
|                | Mean $\pm$ SEM                                          | 0.363 $\pm$<br>0.008 | 0.355 $\pm$<br>0.012 | 0.307 $\pm$<br>0.005 | 0.282 $\pm$<br>0.010 |
|                | Exact p value (NT)                                      |                      | 0.9558               | 0.0041               | <0.0001              |
|                | Exact p value (WT)                                      | 0.9558               |                      | 0.0155               | 0.0002               |
|                | Exact p value (L311S)                                   | 0.0041               | 0.0155               |                      | 0.3568               |
|                | Exact p value (L312P)                                   | <0.0001              | 0.0002               | 0.3568               |                      |
| <b>15 mins</b> | Number of cells analyzed<br>(after removal of outliers) | 45                   | 45                   | 44                   | 42                   |
|                | Mean $\pm$ SEM                                          | 0.222 $\pm$<br>0.005 | 0.259 $\pm$<br>0.013 | 0.275 $\pm$<br>0.003 | 0.275 $\pm$<br>0.022 |
|                | Exact p value (NT)                                      |                      | 0.0927               | 0.0070               | 0.0066               |
|                | Exact p value (WT)                                      | 0.0927               |                      | 0.6983               | 0.6850               |
|                | Exact p value (L311S)                                   | 0.0070               | 0.6983               |                      | >0.9999              |
|                | Exact p value (L312P)                                   | 0.0066               | 0.6850               | >0.9999              |                      |
| <b>30 mins</b> | Number of cells analyzed<br>(after removal of outliers) | 45                   | 37                   | 44                   | 42                   |
|                | Mean $\pm$ SEM                                          | 0.155 $\pm$<br>0.014 | 0.239 $\pm$<br>0.030 | 0.214 $\pm$<br>0.020 | 0.202 $\pm$<br>0.006 |
|                | Exact p value (NT)                                      |                      | 0.0093               | 0.0020               | 0.0173               |
|                | Exact p value (WT)                                      | 0.0093               |                      | 0.9379               | 0.9948               |
|                | Exact p value (L311S)                                   | 0.0020               | 0.9379               |                      | 0.8432               |
|                | Exact p value (L312P)                                   | 0.0173               | 0.9948               | 0.8432               |                      |
| <b>60 mins</b> | Number of cells analyzed<br>(after removal of outliers) | 45                   | 45                   | 41                   | 43                   |
|                | Mean $\pm$ SEM                                          | 0.073 $\pm$<br>0.004 | 0.077 $\pm$<br>0.005 | 0.093 $\pm$<br>0.008 | 0.082 $\pm$<br>0.004 |
|                | Exact p value (NT)                                      |                      | 0.9932               | 0.5486               | 0.9312               |
|                | Exact p value (WT)                                      | 0.9932               |                      | 0.7115               | 0.9870               |
|                | Exact p value (L311S)                                   | 0.5486               | 0.7115               |                      | 0.8827               |
|                | Exact p value (L312P)                                   | 0.9312               | 0.9870               | 0.8827               |                      |

**Table S5. Statistical values - Number of punctae (Tf) Figure S2B**

| Time           |                                                         | NT           | RNF13<br>WT  | RNF13<br>L311S | RNF13<br>L312P |
|----------------|---------------------------------------------------------|--------------|--------------|----------------|----------------|
| <b>0 min</b>   | Number of cells analyzed<br>(after removal of outliers) | 40           | 43           | 39             | 44             |
|                | Mean $\pm$ SEM                                          | 473 $\pm$ 38 | 368 $\pm$ 33 | 434 $\pm$ 46   | 406 $\pm$ 38   |
|                | Exact p value (NT)                                      |              | 0.2133       | 0.8888         | 0.6000         |
|                | Exact p value (WT)                                      | 0.2133       |              | 0.6058         | 0.8925         |
|                | Exact p value (L311S)                                   | 0.8888       | 0.6058       |                | 0.9527         |
|                | Exact p value (L312P)                                   | 0.6000       | 0.8925       | 0.9527         |                |
| <b>15 mins</b> | Number of cells analyzed<br>(after removal of outliers) | 42           | 44           | 36             | 45             |
|                | Mean $\pm$ SEM                                          | 392 $\pm$ 64 | 317 $\pm$ 56 | 327 $\pm$ 69   | 295 $\pm$ 54   |
|                | Exact p value (NT)                                      |              | 0.5126       | 0.6643         | 0.2830         |
|                | Exact p value (WT)                                      | 0.5126       |              | 0.9980         | 0.9764         |
|                | Exact p value (L311S)                                   | 0.6643       | 0.9980       |                | 0.9409         |
|                | Exact p value (L312P)                                   | 0.2830       | 0.9764       | 0.9409         |                |
| <b>30 mins</b> | Number of cells analyzed<br>(after removal of outliers) | 40           | 42           | 42             | 44             |
|                | Mean $\pm$ SEM                                          | 261 $\pm$ 28 | 233 $\pm$ 30 | 172 $\pm$ 41   | 158 $\pm$ 14   |
|                | Exact p value (NT)                                      |              | 0.9557       | 0.3634         | 0.2347         |
|                | Exact p value (WT)                                      | 0.9557       |              | 0.6752         | 0.5088         |
|                | Exact p value (L311S)                                   | 0.3634       | 0.6752       |                | 0.9934         |
|                | Exact p value (L312P)                                   | 0.2347       | 0.5088       | 0.9934         |                |
| <b>60 mins</b> | Number of cells analyzed<br>(after removal of outliers) | 31           | 36           | 34             | 33             |
|                | Mean $\pm$ SEM                                          | 5 $\pm$ 1    | 16 $\pm$ 3   | 4 $\pm$ 1      | 8 $\pm$ 2      |
|                | Exact p value (NT)                                      |              | 0.9968       | >0.9999        | >0.9999        |
|                | Exact p value (WT)                                      | 0.9968       |              | 0.9957         | 0.9985         |
|                | Exact p value (L311S)                                   | >0.9999      | 0.9957       |                | 0.9999         |
|                | Exact p value (L312P)                                   | >0.9999      | 0.9985       | 0.9999         |                |

**Table S6. Statistical values - Pearson's coefficient (Tf), Figure S2C**

| Time    |                                                      | NT                | RNF13 WT          | RNF13 L311S       | RNF13 L312P       |
|---------|------------------------------------------------------|-------------------|-------------------|-------------------|-------------------|
| 0 min   | Number of cells analyzed (after removal of outliers) | 42                | 38                | 39                | 42                |
|         | Mean $\pm$ SEM                                       | 0.398 $\pm$ 0.012 | 0.397 $\pm$ 0.028 | 0.404 $\pm$ 0.009 | 0.405 $\pm$ 0.006 |
|         | Exact p value (NT)                                   |                   | >0.9999           | 0.9987            | 0.9979            |
|         | Exact p value (WT)                                   | >0.9999           |                   | 0.9982            | 0.9972            |
|         | Exact p value (L311S)                                | 0.9987            | 0.9982            |                   | >0.9999           |
|         | Exact p value (L312P)                                | 0.9979            | 0.9972            | >0.9999           |                   |
| 15 mins | Number of cells analyzed (after removal of outliers) | 40                | 41                | 36                | 38                |
|         | Mean $\pm$ SEM                                       | 0.340 $\pm$ 0.008 | 0.371 $\pm$ 0.030 | 0.391 $\pm$ 0.028 | 0.403 $\pm$ 0.048 |
|         | Exact p value (NT)                                   |                   | 0.8595            | 0.5741            | 0.3878            |
|         | Exact p value (WT)                                   | 0.8595            |                   | 0.9573            | 0.8437            |
|         | Exact p value (L311S)                                | 0.5741            | 0.9573            |                   | 0.9888            |
|         | Exact p value (L312P)                                | 0.3878            | 0.8437            | 0.9888            |                   |
| 30 mins | Number of cells analyzed (after removal of outliers) | 43                | 39                | 41                | 40                |
|         | Mean $\pm$ SEM                                       | 0.328 $\pm$ 0.027 | 0.353 $\pm$ 0.013 | 0.348 $\pm$ 0.033 | 0.385 $\pm$ 0.041 |
|         | Exact p value (NT)                                   |                   | 0.9115            | 0.9552            | 0.4654            |
|         | Exact p value (WT)                                   | 0.9115            |                   | 0.9989            | 0.8477            |
|         | Exact p value (L311S)                                | 0.9552            | 0.9989            |                   | 0.7734            |
|         | Exact p value (L312P)                                | 0.4654            | 0.8477            | 0.7734            |                   |
| 60 mins | Number of cells analyzed (after removal of outliers) | 41                | 40                | 35                | 42                |
|         | Mean $\pm$ SEM                                       | 0.322 $\pm$ 0.009 | 0.292 $\pm$ 0.019 | 0.321 $\pm$ 0.015 | 0.358 $\pm$ 0.052 |
|         | Exact p value (NT)                                   |                   | 0.8671            | >0.9999           | 0.7965            |
|         | Exact p value (WT)                                   | 0.8671            |                   | 0.8818            | 0.3472            |
|         | Exact p value (L311S)                                | >0.9999           | 0.8818            |                   | 0.7781            |
|         | Exact p value (L312P)                                | 0.7965            | 0.3472            | 0.7781            |                   |

**Table S7. Statistical values – Manders overlap coefficient, Figure 3A-C**

| <b>Marker</b>              |                                                         | <b>RNF13<br/>WT</b>   | <b>RNF13<br/>LL / AA</b> |
|----------------------------|---------------------------------------------------------|-----------------------|--------------------------|
| <b>EEA1</b><br>(panel A)   | Number of cells analyzed<br>(after removal of outliers) | 30                    | 28                       |
|                            | Mean $\pm$ SEM                                          | 0.07313 $\pm$ 0.00614 | 0.05979 $\pm$ 0.00673    |
|                            | Exact p value                                           |                       | 0.0631                   |
| <b>Lamp 1</b><br>(panel B) | Number of cells analyzed<br>(after removal of outliers) | 30                    | 29                       |
|                            | Mean $\pm$ SEM                                          | 0.3095 $\pm$ 0.0209   | 0.1688 $\pm$ 0.0195      |
|                            | Exact p value                                           |                       | <0.0001                  |
| <b>Rab7</b><br>(panel C)   | Number of cells analyzed<br>(after removal of outliers) | 30                    | 30                       |
|                            | Mean $\pm$ SEM                                          | 0.2866 $\pm$ 0.0154   | 0.2794 $\pm$ 0.0154      |
|                            | Exact p value                                           |                       | 0.5945                   |



**Table S8. Statistical values – Vesicle diameter, Figure 3D-F**

| Marker                     |                                                            | NT                     | RNF13<br>WT            | RNF13<br>LL / AA       |
|----------------------------|------------------------------------------------------------|------------------------|------------------------|------------------------|
| <b>EEA1</b><br>(panel D)   | Number of vesicles analyzed<br>(after removal of outliers) | 75                     | 75                     | 75                     |
|                            | Mean $\pm$ SEM ( $\mu\text{m}$ )                           | 0.4747 $\pm$<br>0.0079 | 0.4701 $\pm$<br>0.0082 | 0.5828 $\pm$<br>0.0112 |
|                            | Exact p value (NT)                                         |                        | >0.9999                | <0.0001                |
|                            | Exact p value (WT)                                         | >0.9999                |                        | <0.0001                |
|                            | Exact p value (LL/AA)                                      | <0.0001                | <0.0001                |                        |
| <b>Lamp 1</b><br>(panel E) | Number of vesicles analyzed<br>(after removal of outliers) | 73                     | 75                     | 75                     |
|                            | Mean $\pm$ SEM ( $\mu\text{m}$ )                           | 0.6129 $\pm$<br>0.0110 | 0.6307 $\pm$<br>0.0118 | 0.7957 $\pm$<br>0.0131 |
|                            | Exact p value (NT)                                         |                        | 0.9636                 | <0.0001                |
|                            | Exact p value (WT)                                         | 0.9636                 |                        | <0.0001                |
|                            | Exact p value (LL/AA)                                      | <0.0001                | <0.0001                |                        |
| <b>Rab7</b><br>(panel F)   | Number of vesicles analyzed<br>(after removal of outliers) | 75                     | 75                     | 75                     |
|                            | Mean $\pm$ SEM ( $\mu\text{m}$ )                           | 0.6941 $\pm$<br>0.0108 | 0.7197 $\pm$<br>0.0132 | 0.8659 $\pm$<br>0.0118 |
|                            | Exact p value (NT)                                         |                        | 0.5839                 | <0.0001                |
|                            | Exact p value (WT)                                         | 0.5839                 |                        | <0.0001                |
|                            | Exact p value (LL/AA)                                      | <0.0001                | <0.0001                |                        |

**Table S9. Statistical values – Manders overlap coefficient, Figure 6C and 6F**

| <b>Marker</b>             |                                                         | <b>CTL</b>          | <b>si#1</b>         | <b>si#2</b>         |
|---------------------------|---------------------------------------------------------|---------------------|---------------------|---------------------|
| <b>Lamp1</b><br>(panel C) | Number of cells analyzed<br>(after removal of outliers) | 30                  | 30                  | 30                  |
|                           | Mean $\pm$ SEM                                          | 0.3161 $\pm$ 0.0207 | 0.1869 $\pm$ 0.0195 | 0.1635 $\pm$ 0.0165 |
|                           | Exact p value (CTL)                                     |                     | 0.0001              | <0.0001             |
|                           | Exact p value (si#1)                                    | 0.0001              |                     | >0.9999             |
|                           | Exact p value (si#2)                                    | <0.0001             | >0.9999             |                     |
| <b>Rab7</b><br>(panel F)  | Number of cells analyzed<br>(after removal of outliers) | 29                  | 30                  | 30                  |
|                           | Mean $\pm$ SEM                                          | 0.3722 $\pm$ 0.0324 | 0.3221 $\pm$ 0.0265 | 0.3389 $\pm$ 0.0277 |
|                           | Exact p value (CTL)                                     |                     | >0.9999             | >0.9999             |
|                           | Exact p value (si#1)                                    | >0.9999             |                     | >0.9999             |
|                           | Exact p value (si#2)                                    | >0.9999             | >0.9999             |                     |

**Table S10. Statistical values – Vesicle diameter, Figure 6D and G**

| Marker                    |                                                         | CTL+<br>vector      | CTL+<br>WT          | si#1+<br>vector     | si#1+<br>WT         | si#2+<br>vector     | si#2+<br>WT         |
|---------------------------|---------------------------------------------------------|---------------------|---------------------|---------------------|---------------------|---------------------|---------------------|
| <b>Lamp1</b><br>(panel D) | Number of vesicles analyzed (after removal of outliers) | 75                  | 72                  | 75                  | 75                  | 75                  | 73                  |
|                           | Mean $\pm$ SEM ( $\mu$ m)                               | 0.6621 $\pm$ 0.0118 | 0.6244 $\pm$ 0.0107 | 0.8384 $\pm$ 0.0150 | 0.8488 $\pm$ 0.0151 | 0.8296 $\pm$ 0.0126 | 0.8338 $\pm$ 0.0136 |
|                           | Exact p value (CTL+vector)                              |                     | >0.9999             | <0.0001             | <0.0001             | <0.0001             | <0.0001             |
|                           | Exact p value (CTL+WT)                                  | >0.9999             |                     | <0.0001             | <0.0001             | <0.0001             | <0.0001             |
|                           | Exact p value (si#1+vector)                             | <0.0001             | <0.0001             |                     | >0.9999             | >0.9999             | >0.9999             |
|                           | Exact p value (si#1+WT)                                 | <0.0001             | <0.0001             | >0.9999             |                     | >0.9999             | >0.9999             |
|                           | Exact p value (si#2+vector)                             | <0.0001             | <0.0001             | >0.9999             | >0.9999             |                     | >0.9999             |
|                           | Exact p value (si#2+WT)                                 | <0.0001             | <0.0001             | >0.9999             | >0.9999             | >0.9999             |                     |
| <b>Rab7</b><br>(panel G)  | Number of vesicles analyzed (after removal of outliers) | 75                  | 75                  | 75                  | 75                  | 75                  | 75                  |
|                           | Mean $\pm$ SEM ( $\mu$ m)                               | 0.7037 $\pm$ 0.0116 | 0.7183 $\pm$ 0.0102 | 0.8689 $\pm$ 0.0115 | 0.8692 $\pm$ 0.0133 | 0.8577 $\pm$ 0.0116 | 0.8637 $\pm$ 0.0133 |
|                           | Exact p value (CTL+vector)                              |                     | >0.9999             | <0.0001             | <0.0001             | <0.0001             | <0.0001             |
|                           | Exact p value (CTL+WT)                                  | >0.9999             |                     | <0.0001             | <0.0001             | <0.0001             | <0.0001             |
|                           | Exact p value (si#1+vector)                             | <0.0001             | <0.0001             |                     | >0.9999             | >0.9999             | >0.9999             |
|                           | Exact p value (si#1+WT)                                 | <0.0001             | <0.0001             | >0.9999             |                     | >0.9999             | >0.9999             |
|                           | Exact p value (si#2+vector)                             | <0.0001             | <0.0001             | >0.9999             | >0.9999             |                     | >0.9999             |
|                           | Exact p value (si#2+WT)                                 | <0.0001             | <0.0001             | >0.9999             | >0.9999             | >0.9999             |                     |
