# Supplementary material for: RNF13 Dileucine Motif Variants L311S and L312P Interfere with Endosomal Localization and AP-3 Complex Association
Source: Cells. 2021 Nov 6;10(11):3063. doi: 10.3390/cells10113063 (PMC8620429; doi:10.3390/cells10113063)
Supplement: Supplementary file 1 [file cells-10-03063-s001.zip]

Archive with 4 entries (4 files):
- Cabana et al 2021_ supplementary figures S1-S4 final.pdf
- __MACOSX/._Cabana et al 2021_ supplementary figures S1-S4 final.pdf
- Cabana et al 2021_ supplementary tables S1-S10 final.pdf
- __MACOSX/._Cabana et al 2021_ supplementary tables S1-S10 final.pdf
